# Supplementary material for: Asiatic Acid Attenuates Inflammation Induced by Salmonella via Upregulating LncRNA TVX1 in Microglia
Source: MDPI journal article supplement (doi:10.3390/ijms231810978), 2022-09-19
Supplement: s1 [file s1]

# Asiatic Acid Attenuates Inflammation Induced by *Salmonella* via Upregulating LncRNA TVX1 in Microglia

Wenshu Zou, Jingyan Zhang, Kai Zhang, Zhiping Peng, Ruihua Xin, Lei Wang and Jianxi Li \*

Engineering and Technology Research Center of Traditional Chinese Veterinary Medicine of Gansu Province, Key Laboratory of Veterinary Pharmaceutical Development of Ministry of Agriculture and Rural Affairs of China, Lanzhou Institute of Husbandry and Pharmaceutical Sciences Chinese Academy of Agricultural Sciences, Lanzhou 730050, China;

\* Correspondence: lijianxi@caas.cn; Tel.: +86-09312115263

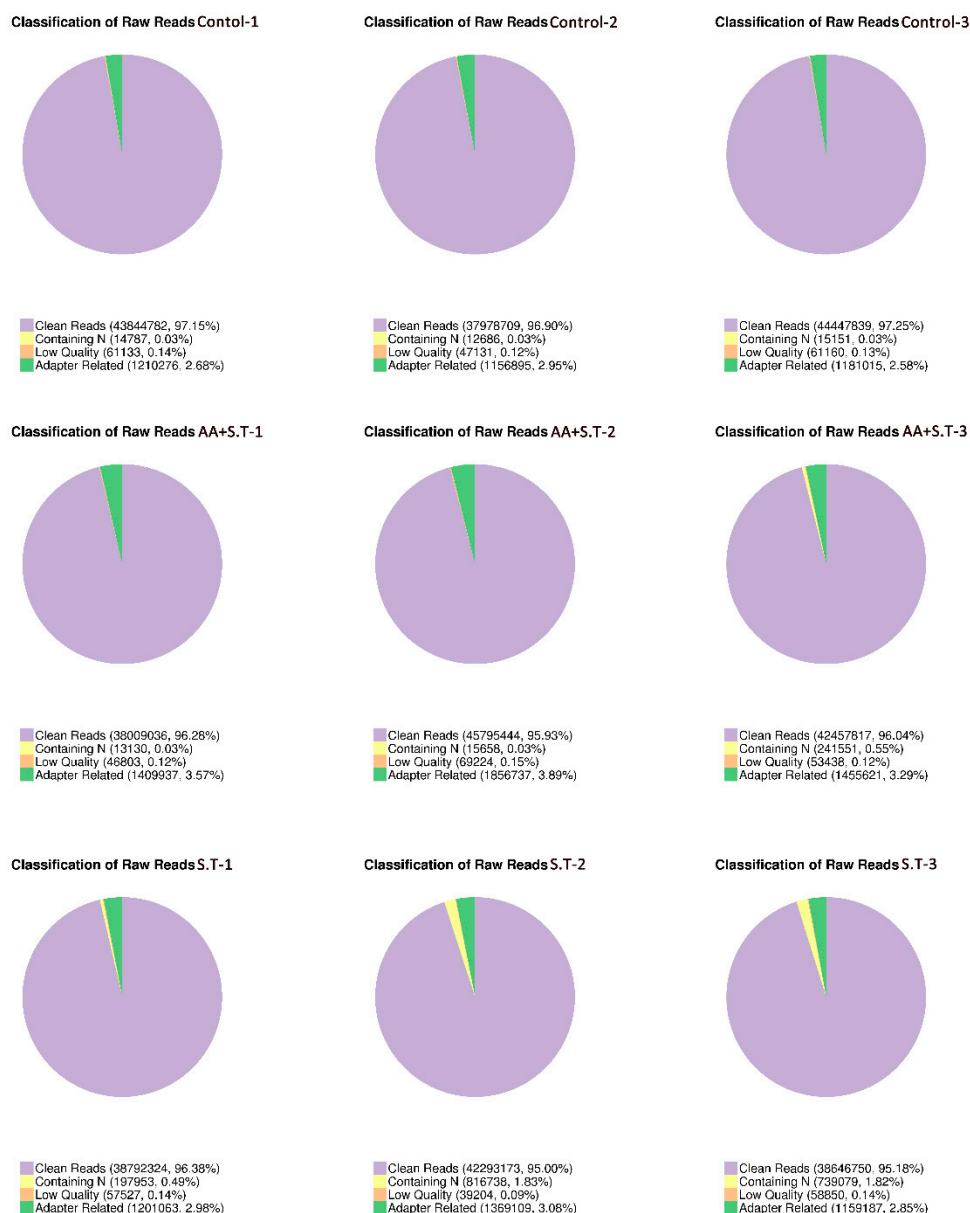

Figure S1. Raw data of lncRNA sequencing. Data represent the control, *S.T* and AA + *S.T*, n=3 per group.

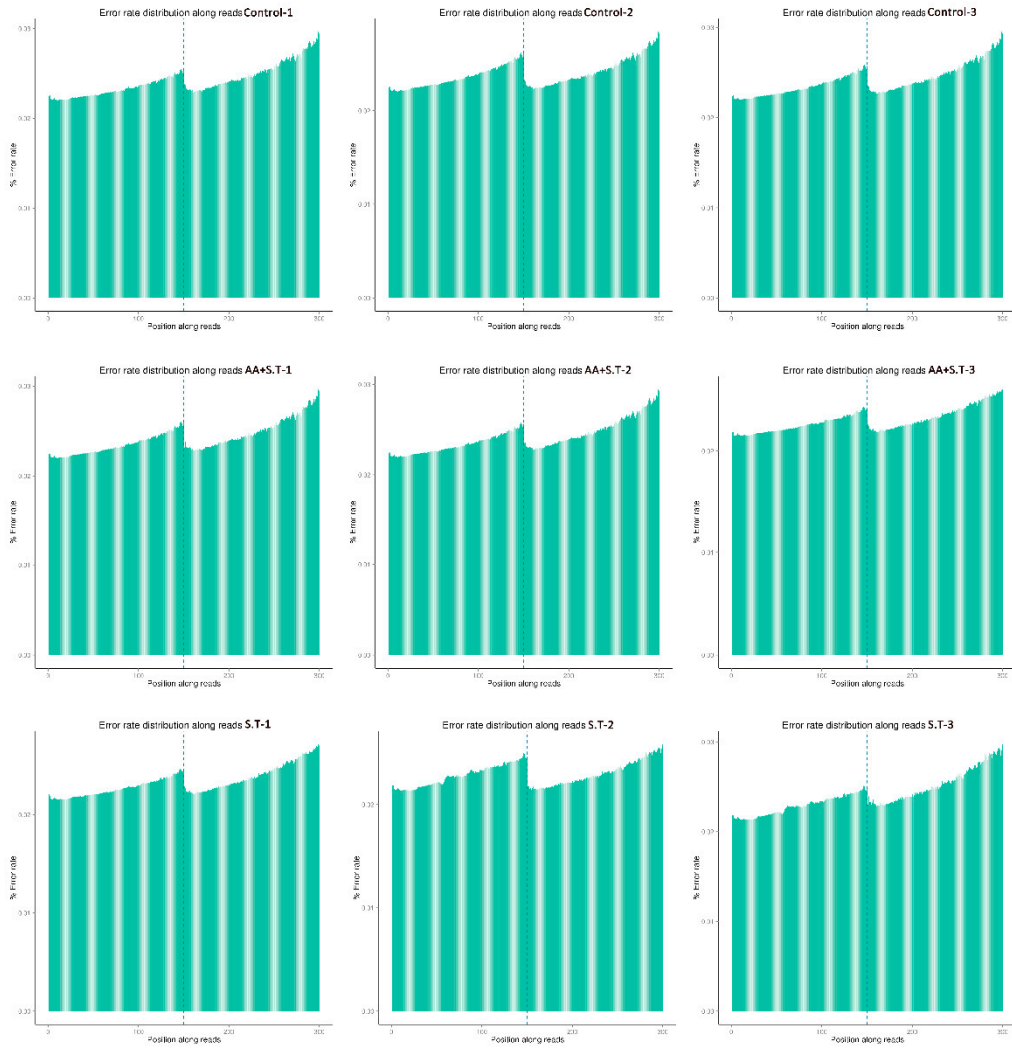

Figure S2. Error rate distribution map of lncRNA sequencing. X-axis is the base position of reads, Y-axis is the single base error rate. Data represent the control, *S.T* and AA + *S.T*, n=3 per group.

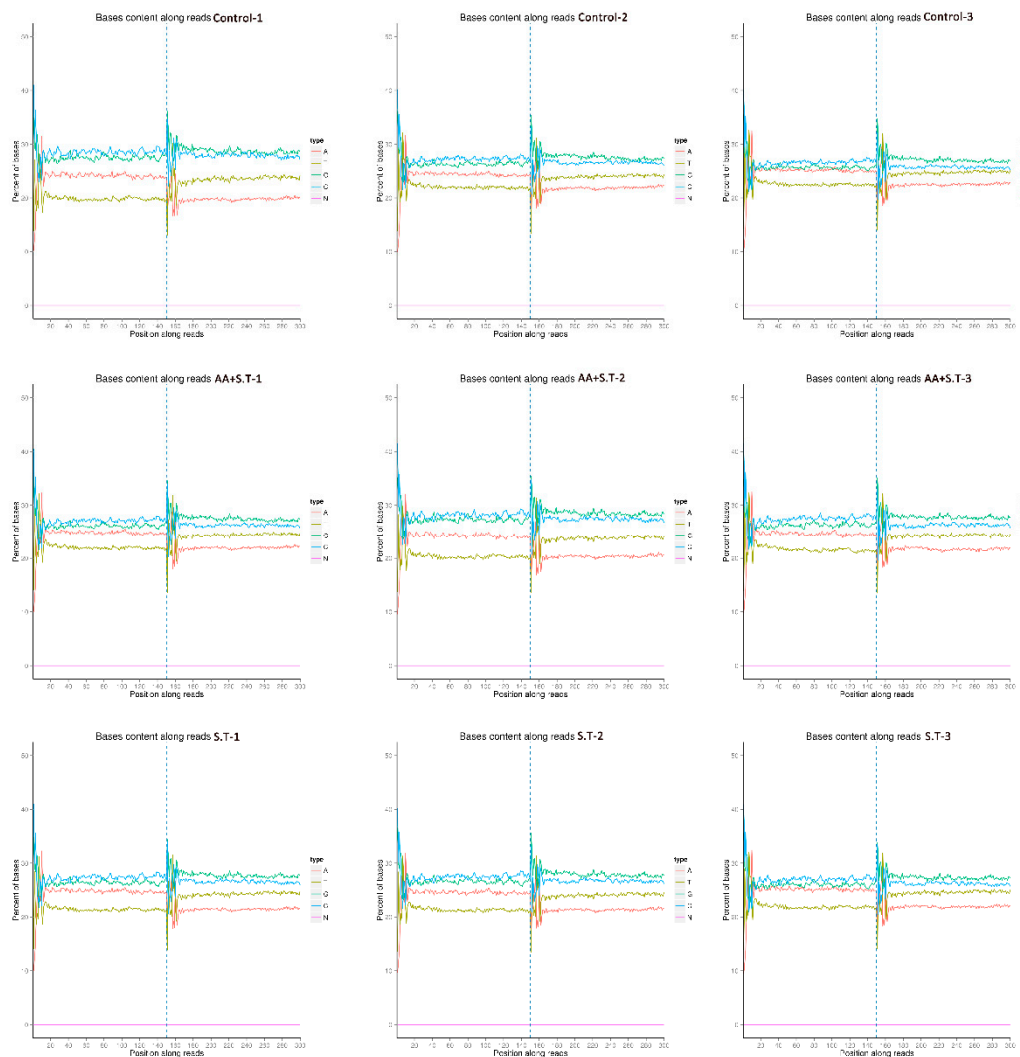

Figure S3. GC content of lncRNA sequencing. X-axis is the base position of reads, Y-axis is the proportion of the base. Data represent the control, *S.T* and AA + *S.T*, n=3 per group.

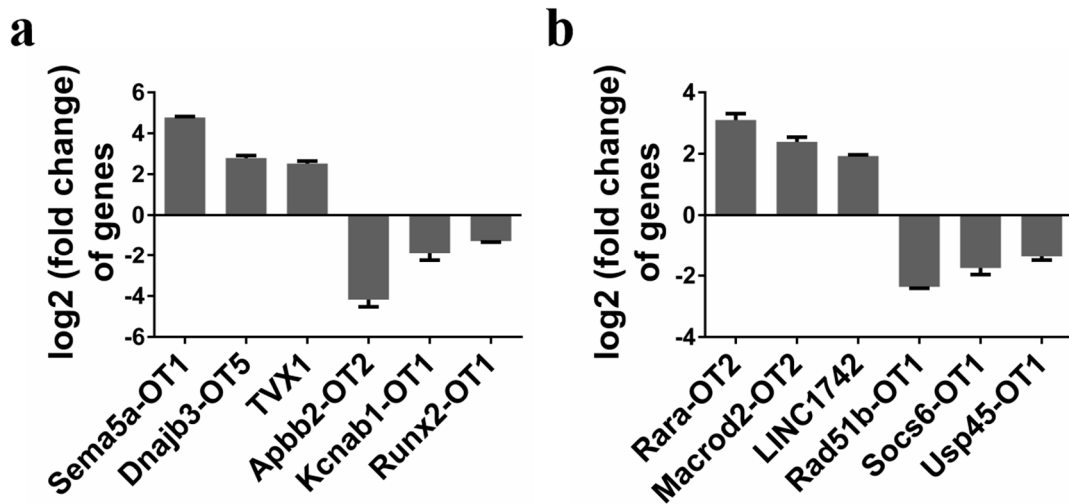

Figure S4 Verification of lncRNA sequencing results using qPCR.

(a) Differential lncRNAs between *S.T* and control. (b) Differential lncRNAs between *S.T* and AA + *S.T*.

Values are expressed as the mean  $\pm$  SEM (n = 3 per group).

**Table S1.** The primers for RT-q PCR used in present study

| Name           | Primer sequence (5' - 3')   |
|----------------|-----------------------------|
| $\beta$ -actin | F: CCACCATGTACCCAGGCATT     |
|                | R: AGGGTGTAACACGCAGCTCA     |
| Runx2-OT1      | F: AAGCCATCCCACTCCTTCGGTAG  |
|                | R: TCCAGCCCTGCCACATCAGAG    |
| Apbb2-OT2      | F: GAATCTCGCTGCCGCTGCTC     |
|                | R: GCTCCCAGGTCTCGCAGTCC     |
| Kcnab1-OT1     | F: TCCTCCTCGGACTGCTGCTTG    |
|                | R: CCTTCCCTGCCTCCCTGCTC     |
| TVX1           | F: GCCGAGCCTCAGCCACATAATC   |
|                | R: TGTGTCTCTTACTCCTGCGTCTCC |
| Sema5a-OT1     | F: AGCCGCACGCATTTCATACCC    |
|                | R: ATCACTCCCCTCCAACAGTTCCTC |
| Dnajb3-OT5     | F: GGCATCATCACCATCGGAACTCC  |
|                | R: GACTCGGGCATTATCACACACTC  |

|              |                                                            |
|--------------|------------------------------------------------------------|
| Socs6-OT1    | F: CGATGAAGCACAGTGAGTGAGACC<br>R: GACACCATGCAGACACCTGACAG  |
| Rad51b-OT1   | F: GAAACTGAAGGCGGCCATGG<br>R: GCTCTGCTCCGAAGTGAGGT         |
| Usp45-OT1    | F: ACCTGCTGAGTGATGGTGGC<br>R: AACCTFCTCTGTGGACCAGG         |
| Rara-OT2     | F: CCCCATGCCCCGAGGAAGAG<br>R: CCAAGCAGCCACAGTCAGAAGAG      |
| MacroD2-OT2  | F: AGGCTCTGAGGTGCTGCTGTG<br>R: CTCGGGAGGGAAAAGTGCAAAGG     |
| LINC1742     | F: GCATGTATGTCAGGGCACCAGATG<br>R: GCATGTATGTCAGGGCACCAGATG |
| IL-1 $\beta$ | CACTACAGGCTCCGAGATGAACAAC<br>TGTCGTTGCTTGGTTCTCCTTGTAC     |
| IL-6         | CTCCCAACAGACCTGTCTATAC<br>CCATTGCACAACCTCTTTTCTCA          |
| IL-18        | AGACCTGGAATCAGACAACCTT<br>TCAGTCATATCCTCGAACACAG           |

**Table S2.** Quality assessment of lncRNA sequencing.

| Sample | Raw      | Clean    | Raw       | Clean     | Error    | Q20 (%) | Q30 (%) | GC          |
|--------|----------|----------|-----------|-----------|----------|---------|---------|-------------|
| name   | reads    | reads    | bases (G) | bases (G) | rate (%) |         |         | content (%) |
| A 1    | 90261956 | 87689564 | 13.54     | 13.15     | 0.02     | 98.38   | 94.98   | 56.45       |
| A 2    | 78390842 | 75957418 | 11.76     | 11.39     | 0.02     | 98.50   | 95.26   | 53.99       |
| A 3    | 91410330 | 88895678 | 13.71     | 13.33     | 0.02     | 98.43   | 95.05   | 52.68       |
| B 1    | 78957812 | 76018072 | 11.84     | 11.40     | 0.02     | 98.39   | 94.95   | 53.57       |
| B 2    | 95474126 | 91590888 | 14.32     | 13.74     | 0.02     | 98.39   | 95.03   | 55.75       |
| B 3    | 88416854 | 84915634 | 13.26     | 12.74     | 0.02     | 98.83   | 96.25   | 53.98       |
| C 1    | 80497734 | 77584648 | 12.07     | 11.64     | 0.02     | 98.68   | 95.90   | 54.16       |

|     |          |          |       |       |      |       |       |       |
|-----|----------|----------|-------|-------|------|-------|-------|-------|
| C 2 | 89036448 | 84586346 | 13.36 | 12.69 | 0.02 | 98.90 | 96.34 | 54.46 |
| C 3 | 81207732 | 77293500 | 12.18 | 11.59 | 0.02 | 98.45 | 95.10 | 53.38 |

---
